# Supplementary material for: Depression among refugee youth in an outpatient healthcare center—prevalence and associated factors
Source: Frontiers journal article supplement (doi:10.3389/fpsyt.2024.1367799), 2024-04-19
Supplement: Data_Sheet_1.PDF [file Data_Sheet_1.PDF]

## Supplemental Material

This document provides the supplemental material for the manuscript ‘Depression among refugee youth in an outpatient health care center – prevalence and associated factors’.

### Figure S1

#### *Evidence plots main analysis*

Strong evidence

**A**

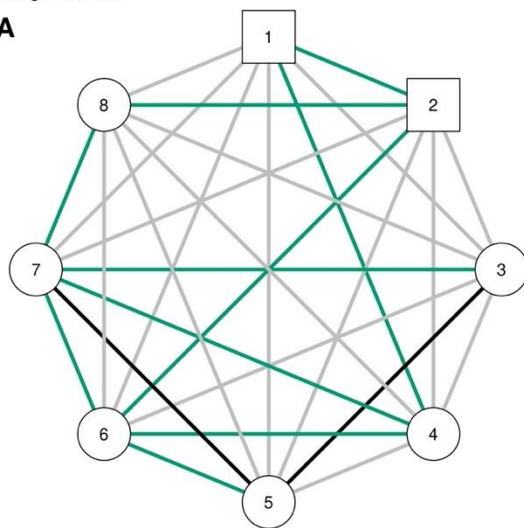

Weak evidence

**B**

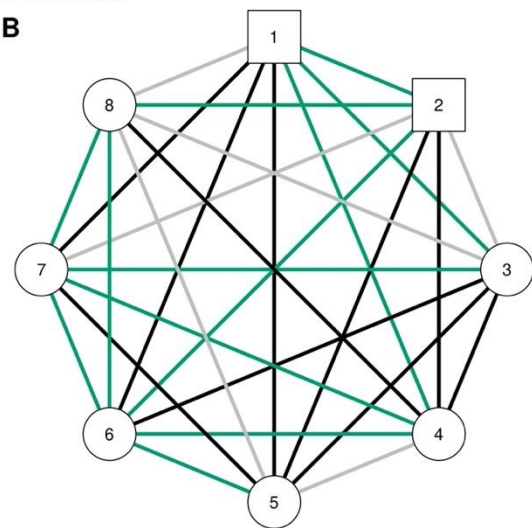

*Note. 1 = Depression; 2 = PTSD; 3 = Age; 4 = Gender; 5 = Duration of flight (in days); 6 = N traumatic experiences; 7 = Accompanying status (flight); 8 = Residence status*

Figure S1 shows evidence plots from the main analysis. Circles represent the risk factors and the squares the PTSD and depression diagnosis. Green relations represent edges with evidence for presence, whereas black connections represent edges with evidence of absence.

**Table S1***Prevalence of depression sensitivity analysis*

| Depressive episode          | Prevalence | 95 % CI     |
|-----------------------------|------------|-------------|
| Mild depressive episode     | 0.02       | 0.01 - 0.04 |
| Moderate depressive episode | 0.13       | 0.09 - 0.16 |
| Severe depressive episode   | 0.33       | 0.28 - 0.38 |

*Note.* CI = Credibility interval, LL = Lower level, UL = Upper level

**Table S2***Comorbidity depression diagnosis with PTSD diagnosis*

|         |              | No/mild depression<br><i>N (%)</i> | Moderate/severe depression<br><i>N (%)</i> | Sum<br><i>N (%)</i> |
|---------|--------------|------------------------------------|--------------------------------------------|---------------------|
| No PTSD | <i>N (%)</i> | 101 (31.0)                         | 27 (8.3)                                   | 128 (39.2)          |
| PTSD    | <i>N (%)</i> | 76 (23.3)                          | 122 (37.4)                                 | 198 (60.7)          |
| Sum     | <i>N (%)</i> | 177 (54.3)                         | 149 (45.7)                                 | 326 (100)           |

*Note.* PTSD = Post-traumatic stress disorder. Diagnosis criteria of the ICD-10 were applied.

**Table S3***Results of the logistic regression analysis*

| Predictors                   | OR   | 95 % CI     | BF <sub>01</sub> |
|------------------------------|------|-------------|------------------|
| Intercept                    | 0.00 | 0.00 - 0.12 |                  |
| Age                          | 1.15 | 1.02 - 1.31 | 88.49            |
| Gender                       | 1.82 | 1.01 - 3.28 | 44.2             |
| Duration of flight (in days) | 1.00 | 1.00 - 1.00 | 0.88             |
| N traumatic experiences      | 1.04 | 1.00 - 1.07 | 41.38            |
| Accompanying status          | 0.95 | 0.50 - 1.79 | 0.79             |
| Residence status             | 0.95 | 0.54 - 1.64 | 0.73             |
| PTSD                         | 4.35 | 2.43 - 7.89 | Inf              |

*Note.* OR = Odds ratio, CI = Credibility interval, BF = Bayes factor, PTSD = Post-traumatic stress disorder

**Figure S2**

*Network model of risk factors, depression, and PTSD sensitivity analysis*

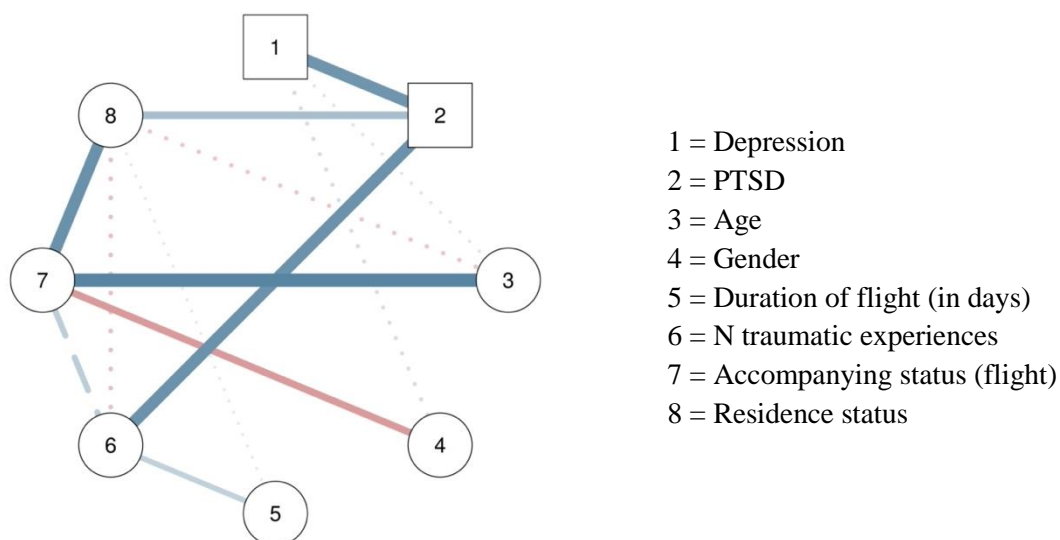

*Note.* Red connections represent negative edges, while blue associations represent positive edges, thickness indicates the edge weight, e.g., how strongly two nodes are connected. Strong evidence for the presence of an edge is displayed with a solid line ( $BF < 10$ ), weak evidence for edges with a dashed line ( $BF > 3 < 10$ ), and insufficient evidence ( $BF < 3$ ) with dotted edges. BF = Bayes factor.

### Figure S3

*Evidence plots sensitivity analysis*

Strong evidence

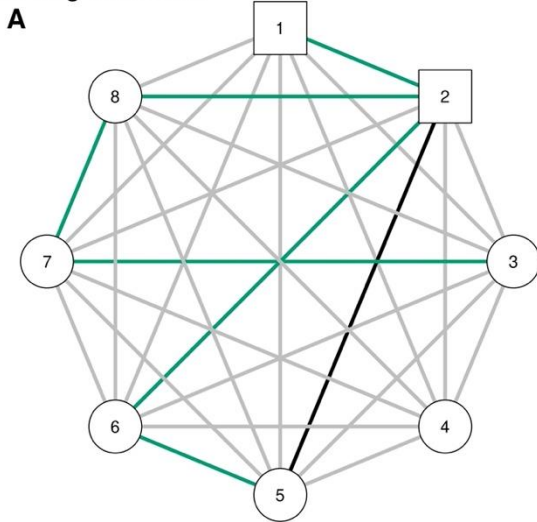

weak evidence

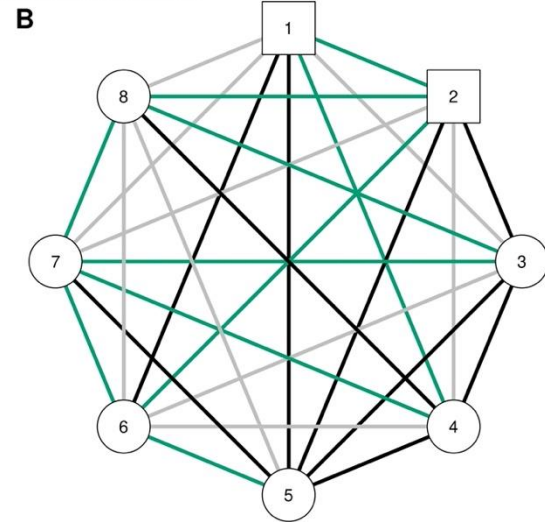

*Note.* 1 = Depression; 2 = PTSD; 3 = Age; 4 = Gender; 5 = Duration of flight (in days); 6 = N traumatic experiences; 7 = Accompanying status (flight); 8 = Residence status

Figure S3 shows evidence plots from the sensitivity analysis. Circles represent the risk factors and the squares the PTSD and depression diagnosis. Green relations represent edges with evidence for presence, whereas black connections represent edges with evidence of absence.
